# Supplementary material
Source: PubMed Central journal article supplement (PMC3874782)
Supplement: supp_127.1.33_JCS123885.pdf [file supp_127.1.33_JCS123885.pdf]

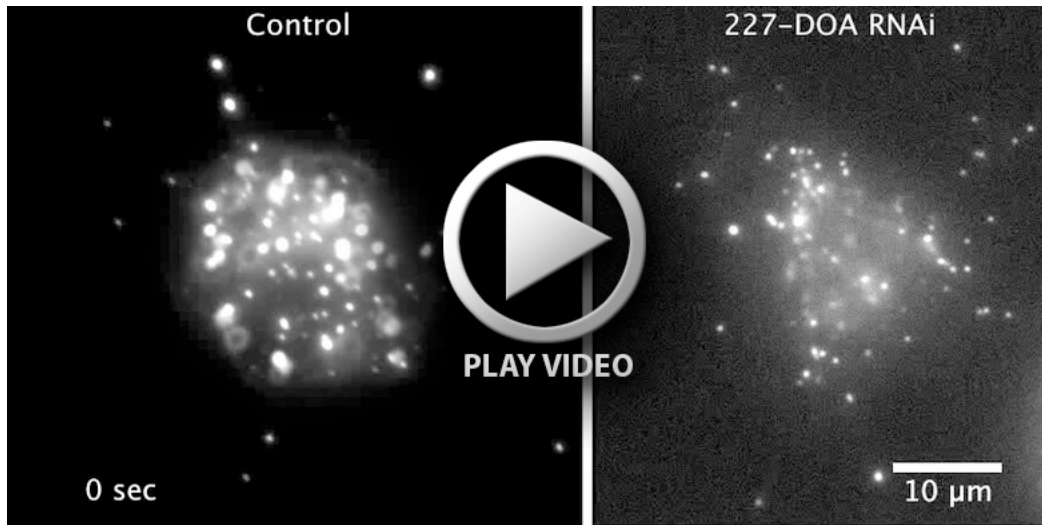

**Movie 1. Effect of DOA knockdown on peroxisome movement in S2 cells.** Control cell is on the left panel, cell after DOA knockdown is on the right panel.

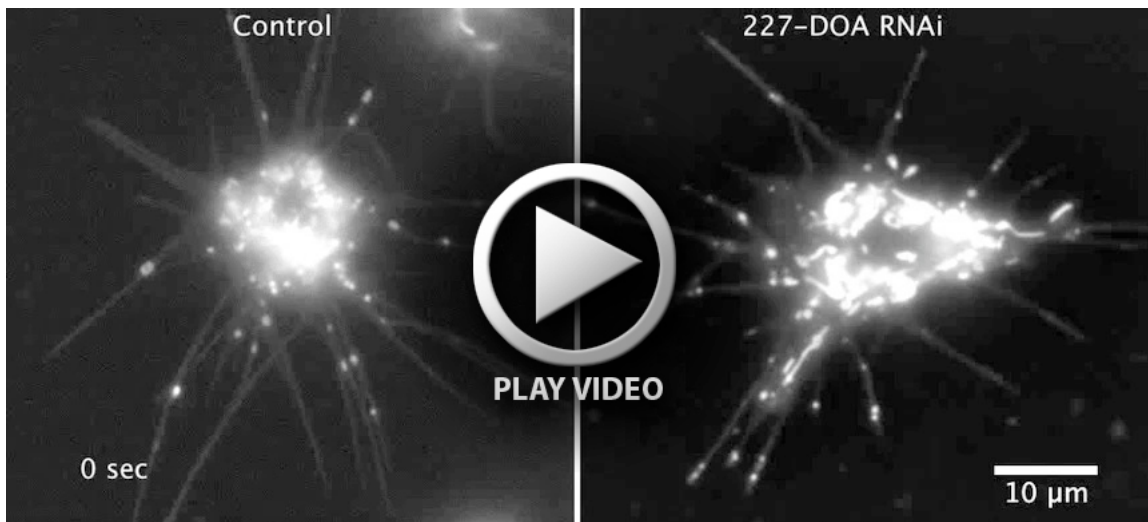

**Movie 2. Effect of DOA knockdown on mitochondria movement in S2 cells.** Control cell is on the left panel, cell after DOA knockdown is on the right panel.

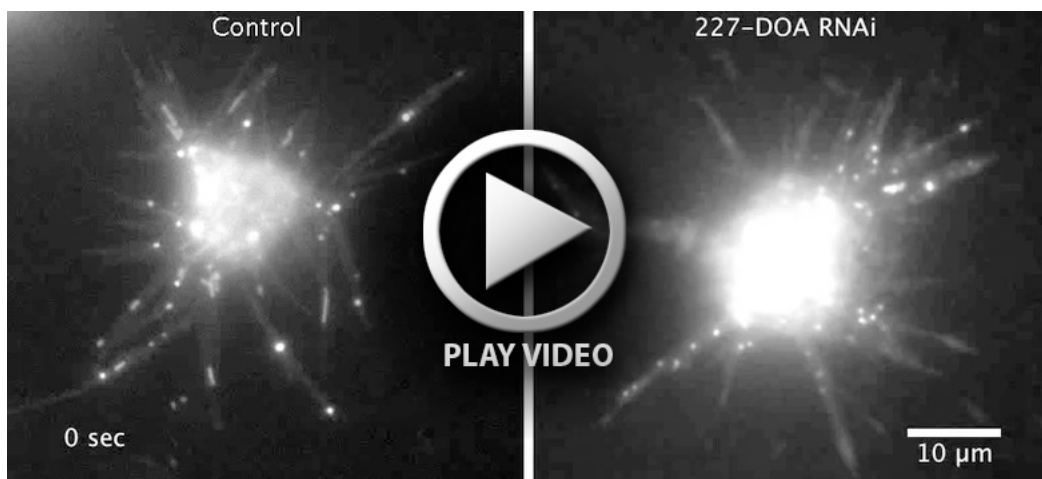

**Movie 3. Effect of DOA knockdown on lysosome movement in S2 cells.** Control cell is on the left panel, cell after DOA knockdown is on the right panel.
